# Supplementary material for: A catalytically and genetically optimized β-lactamase-matrix based assay for sensitive, specific, and higher throughput analysis of native henipavirus entry characteristics
Source: PubMed Central journal article supplement (PMC2727953; doi:10.1186/1743-422x-6-119), 2009-07-31
Supplement: 1743-422X-6-119-S1.pdf [file 1743-422X-6-119-S1.pdf]

## Additional file 1

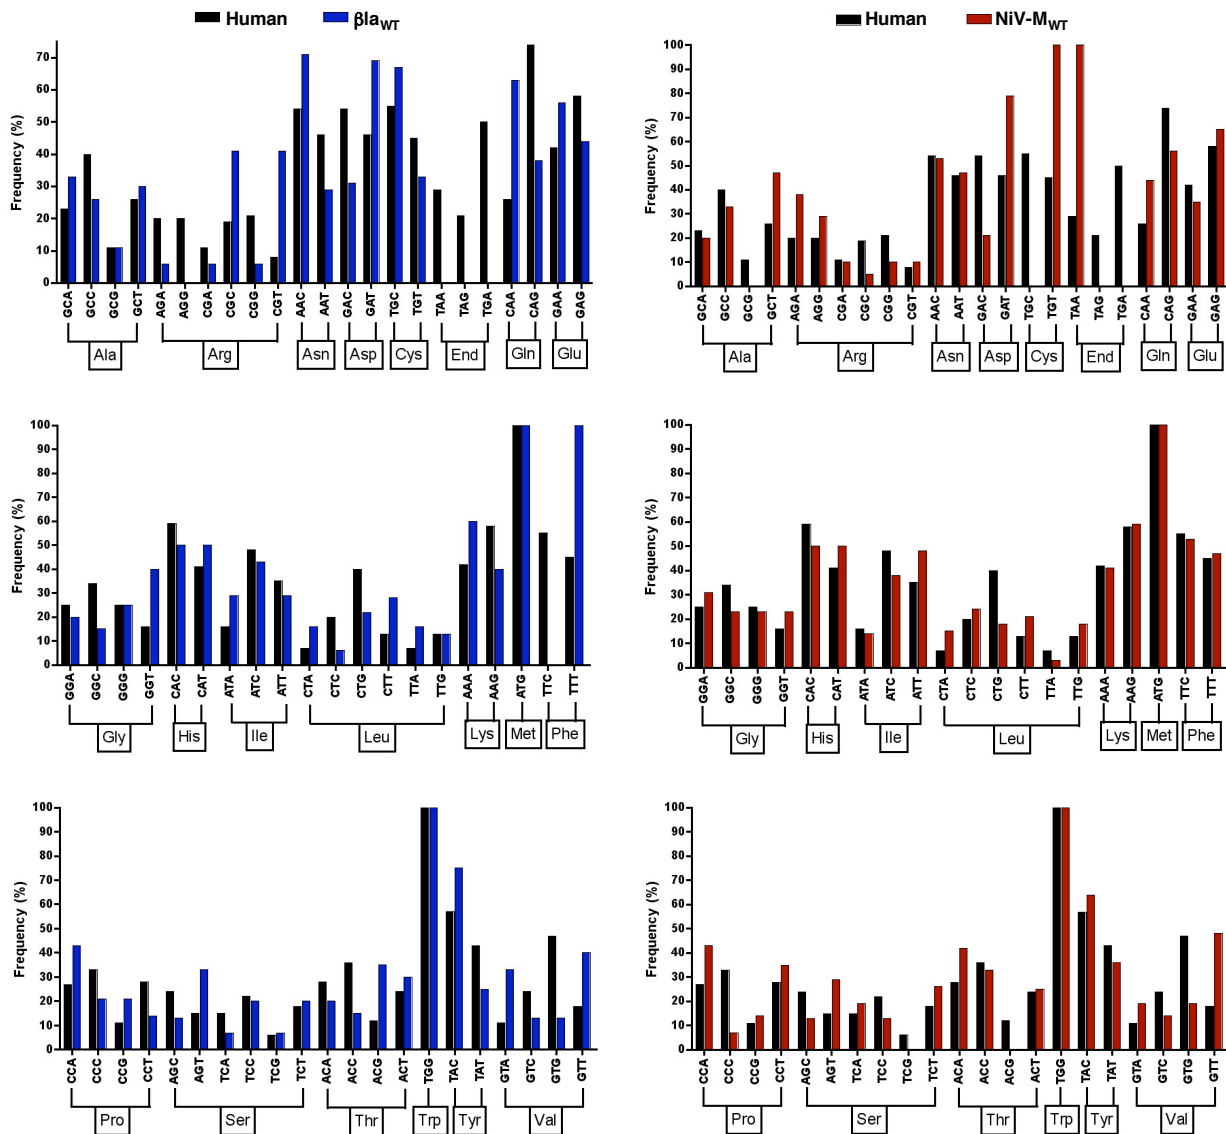

**Table 1. Codon usage comparisons between wild-type Nipah matrix (henipavirus), beta-lactamase (bacteria) and average Homo sapiens genes.** Note the skewing towards more rarely used mammalian codons. Overall, codon usage for amino acids cumulatively demonstrates a pattern of rare mammalian codon usage.
